# Supplementary material for: Central sensitization associated with low fetal hemoglobin levels in adults with sickle cell anemia
Source: publisher site journal article supplement (doi:10.1016/j.sjpain.2017.08.001), 2017-09-30
Supplement: Supplementary file 1 [file 1-s2.0-S1877886017301738-mmc1.docx]

**Supplemental Data For:**

**Central sensitization associated with fetal hemoglobin levels in adults with sickle cell anemia**

Deepika S. Darbaria,b; Kathleen J. Vaughana; Katherine Roskoma; Cassie Seamona; Lena Diawa; Meghan Quinna; Anna Conreya; Alan N. Schechterc; Jennifer A. Haythornthwaited; Myron A. Waclawiwe; Gwenyth R. Wallenf; Inna Belferg,h; James G. Taylor VIa,i,⃰

a Genomic Medicine Section, Hematology Branch, National Heart, Lung and Blood Institute, National Institutes of Health, Bethesda, MD, USA; b Center for Cancer and Blood Diseases, Children’s National Medical Center, George Washington University School of Medicine and Health Sciences, Washington, DC, USA; c Molecular Biology and Genetics Section, Molecular Medicine Branch, National Institute of Diabetes and Digestive and Kidney Diseases, National Institutes of Health, Bethesda, MD, USA; d Center for Mind-Body Research, Department of Psychiatry and Behavioral Sciences, Johns Hopkins Bayview Medical Center, Baltimore, MD, USA; e Office of Biostatistics Research, National Heart, Lung and Blood Institute, National Institutes of Health, Bethesda, MD, USA; f National Institutes of Health, Clinical Center, Bethesda, MD, USA; g Department of Anesthesiology, University of Pittsburgh School of Medicine, Pittsburgh, Pennsylvania, USA; h Office of Research on Women’s Health, National Institutes of Health, Bethesda, MD, USA; i Department of Medicine and Center for Sickle Cell Disease, Howard University College of Medicine, Washington, DC, USA

IB and JGT made equal contributions to this study.

⃰ Corresponding author: James G. Taylor VI, M.D.; Department of Medicine and Center for Sickle Cell Disease, Howard University College of Medicine, 2041 Georgia Avenue, Washington, DC 20060, USA; Phone +1 202-865-3118; Fax +1 202-232-6719

[James.taylor2@howard.edu](mailto:James.taylor2@howard.edu)

**Supplemental Fig. 1. Recruitment of a Cross Sectional Sample of Adults with Sickle Cell Anemia and Age and Sex Matched Controls.** Most subjects with sickle cell anemia were approached in order of enrollment on the Bethesda Sickle Cell Cohort Study from January, 2011 onward. The first 28 SS subjects identified and approached using this strategy enrolled on the pain study. Two additional subjects contacted the study team regarding participation and were consented to the study. Normal volunteers were screened for sickle cell trait if they met other entry criteria (age, sex match to SS subject; no history of chronic pain). Thirty out of 36 screened controls were enrolled on the study and underwent quantitative sensory testing along with the 30 sickle cell anemia subjects. SS=sickle cell anemia; NV=normal volunteer.

**
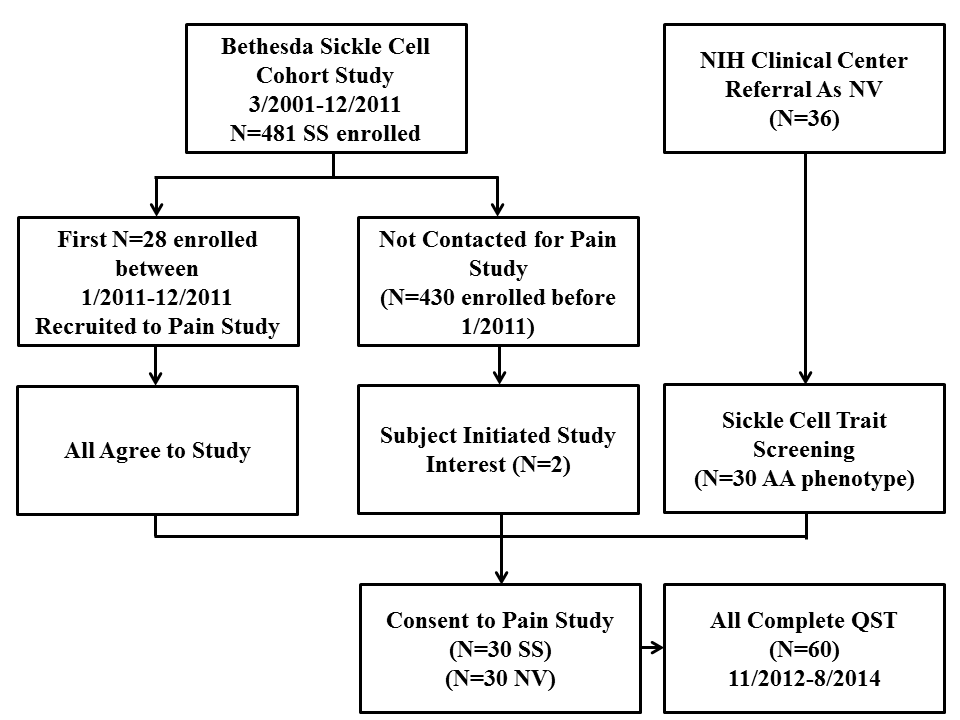
**

**Supplemental Fig. 2. Conditioned pain modulation testing.** (A) Heat pain threshold pain scores were determined using the Medoc analyzer on the volar forearm when the contralateral hand was in either no water bath, a room temperature water bath (habituation test) or a hot water bath (the CPM or inhibitory second stimulus). NVs had a non-significant decline in pain scores during CPM testing (p=0.42) while pain scores were unchanged for sickle cell subjects.

**

**

**Supplemental Table 1. No differences between sickle cell anemia and normal volunteers in mechanical light touch testing using von Frey filaments.** Ascending filament pressure was defined as the pressure recorded where the subject first felt the sensation of touch with a filament during testing with sequential ascending filaments (smallest to largest). Descending filament pressure was defined as the pressure recorded where the subject first noted to absence of a touch sensation during testing with sequential descending filaments (largest to smallest).

| **von Frey Testing Method** | **SS (n=30)**  **Mean Filament Pressure (SD)** | **Normal Volunteer (n=30)**  **Mean Filament Pressure (SD)** | **p value** |
| --- | --- | --- | --- |
| Ascending filaments (grams) | 0.33 (0.52) | 0.33 (0.57) | 0.96 |
| Descending filaments (grams) | 0.98 (1.06) | 1.00 (1.59) | 0.95 |
